# Supplementary material for: Characterization of Autosomal Dominant Hypercholesterolemia Caused by PCSK9 Gain of Function Mutations and Its Specific Treatment With Alirocumab, a PCSK9 Monoclonal Antibody
Source: PubMed Central journal article supplement — Circ Cardiovasc Genet. 2015 Dec 15;8(6):823–31. doi: 10.1161/CIRCGENETICS.115.001129 (PMC5098466; doi:10.1161/circgenetics.115.001129), 2015-12-15
Supplement: hcg-8-823-s004.pdf [file hcg-8-823-s004.pdf]

Dear Editors,

RE: Circulation: Cardiovascular Genetics: CIRCCVG/2015/001129-T1 (Characterization of Autosomal Dominant Hyperc...)

I hereby give consent for removal of my name from the author list of the above mentioned manuscript, and consent for my name to be shown in the acknowledgments.

Kind regards,

Dr. Véronique Maire

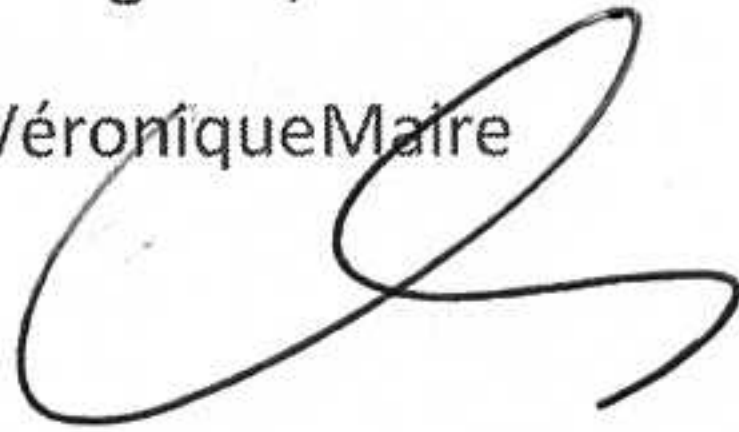A handwritten signature in black ink, consisting of a large, stylized 'V' followed by a horizontal stroke and a small loop at the end.
